# Supplementary material
Source: Springer Nature journal article supplement (https://www.springermedizin.de/resource/supplementary/12990_2014_671_MOESM8_ESM.pdf/9612348)

**A**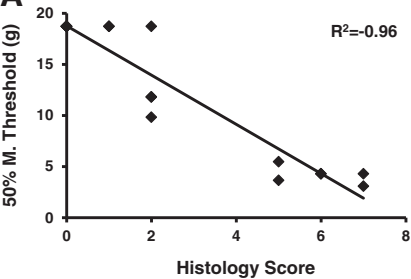**B**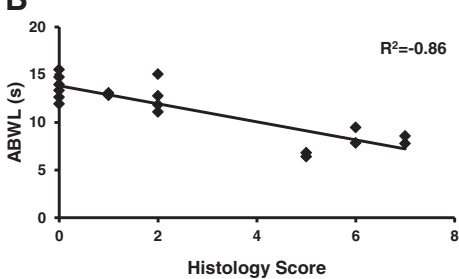**C**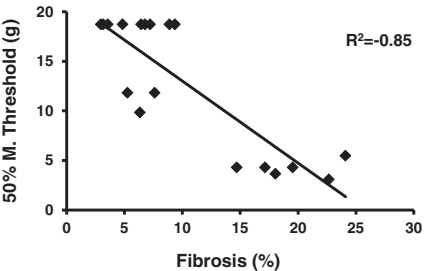**D**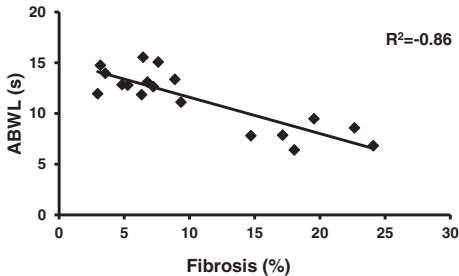

Supplement: MOESM8 [file 9612348]
